# Supplementary material
Source: publisher figshare collection journal article supplement (https://gsajournals.figshare.com/ndownloader/files/26557622)
Supplement: Supplementary file 1 [file 26557622]

## Sheet: Sheet1
Table S7. Genomic diversity and inbreeding of the sampled Hermetia illucens EVE population.
Query sequence	Pi (π)	Tajima D	ROH (#)	ROH mean length (kb)	FROH
S1	0.017	2.1	68	415.43	0.011
S2	0.018	1.802	37	282.13	0.005
S3	0.019	2.17	21	299.14	0.003
S4	0.018	1.019	38	270.68	0.005
S5	0.01	-0.066	193	439.1	0.06
S6	0.016	1.586	85	396.49	0.027
S7	0.072	0.428	2	573.86	0.04
Genome Wide	0.017	1.576	444	393.81	0.019
Statistics describing mean H. illucens sequence diversity, Tajima D values, ROH counts, ROH mean lengths and inbreeding coefficients of the sampled population. Reported statistics generated on a per chromosome basis and genome wide. a Final genome wide FROH excludes identified sex chromosome seven (S7).
